# Supplementary material for: Sustainable Electrochemical Depolymerization of Lignin in Reusable Ionic Liquids
Source: PubMed Central journal article supplement (PMC5505966; doi:10.1038/s41598-017-05316-x), 2017-07-11
Supplement: 41598_2017_5316_MOESM1_ESM.pdf [file 41598_2017_5316_MOESM1_ESM.pdf]

## *Electronic Supplementary Information*

# **Sustainable Electrochemical Depolymerization of Lignin in Reusable Ionic Liquids**

**Tobias K.F. Dier,<sup>1</sup> Daniel Rauber,<sup>2</sup> Dan Durneata,<sup>2</sup> Rolf Hempelmann,<sup>2</sup> Dietrich A. Volmer<sup>1</sup>**

<sup>1</sup>Institute of Bioanalytical Chemistry, Saarland University, Campus B2.2, 66123 Saarbrücken, Germany. <sup>2</sup>Institute of Physical Chemistry, Saarland University, Campus B2.2, 66123 Saarbrücken, Germany. Correspondence and requests for materials should be addressed to D.A.V. (email: Dietrich.Volmer@mx.uni-saarland.de)

**Figure S1.** Calibration curve of the titanium(IV)-hydrogen peroxide complex using UV/Vis spectrometry at 415 nm.....2

**Figure S2.** NMR spectra of 1-ethyl-3-methylimidazolium trifluoromethanesulfonate ([emim][OTf]) after and prior to electrochemical treatment.....3

**Figure S3.** NMR spectra of triethylammonium methanesulfonate (TMS) after and prior to electrochemical treatment .....4

**Figure S4.** Base peak chromatograms and averaged mass spectra for each degradation process.....5

**Figure S5.** Overlay of Kendrick mass defect data of the purified fraction 3 from TMS-2.5-H<sub>2</sub>O and the corresponding raw mixture after electrochemical treatment using 2D mass defect filtering.....6

**Figure S6.** Base peak chromatograms and averaged mass spectra for each degradation process.....7

**Figure S7. A** Total intensity for relevant lignin degradation products. **B** Relative distributions (%) of chemical classes for fraction 2. **C** Relative distributions (%) of classes for fraction 3.. .....8

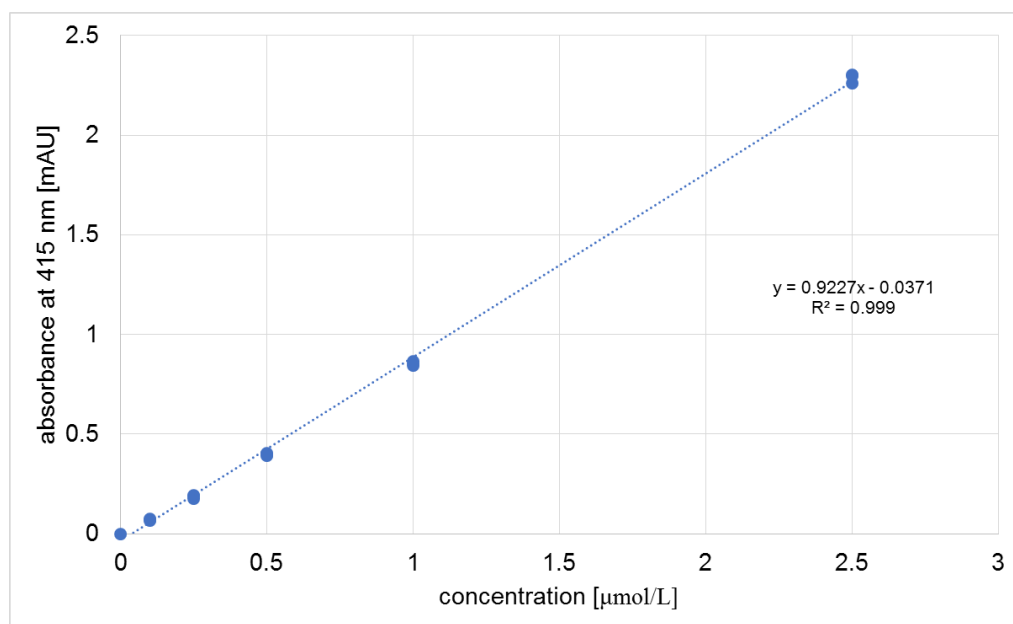

**Figure 1.** Calibration curve of the titanium(IV)-hydrogen peroxide complex using UV/Vis spectrometry at 415 nm. Concentrations of the calibration solutions: 0.0, 0.1, 0.25, 0.5, 1.0, and 2.5  $\mu\text{mol/L}$ .

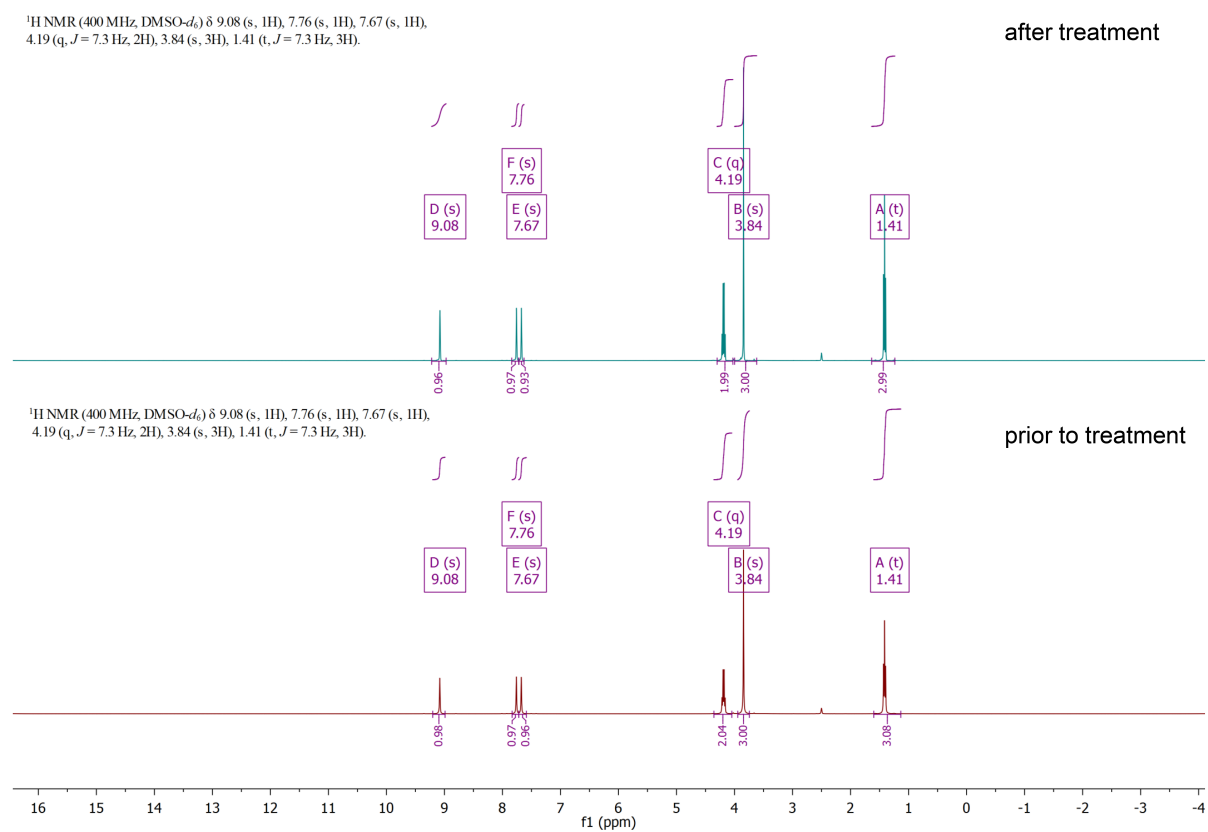

**Figure S2.** NMR spectra of 1-ethyl-3-methylimidazolium trifluoromethanesulfonate ([emim][OTf]) after (top) and prior to electrochemical treatment (bottom).

$^1\text{H}$  NMR (400 MHz,  $\text{DMSO-}d_6$ )  $\delta$  9.18 (s, 1H), 3.09 (qd,  $J = 7.3, 4.8$  Hz, 6H), 2.38 (s, 3H), 1.18 (t,  $J = 7.3$  Hz, 9H).

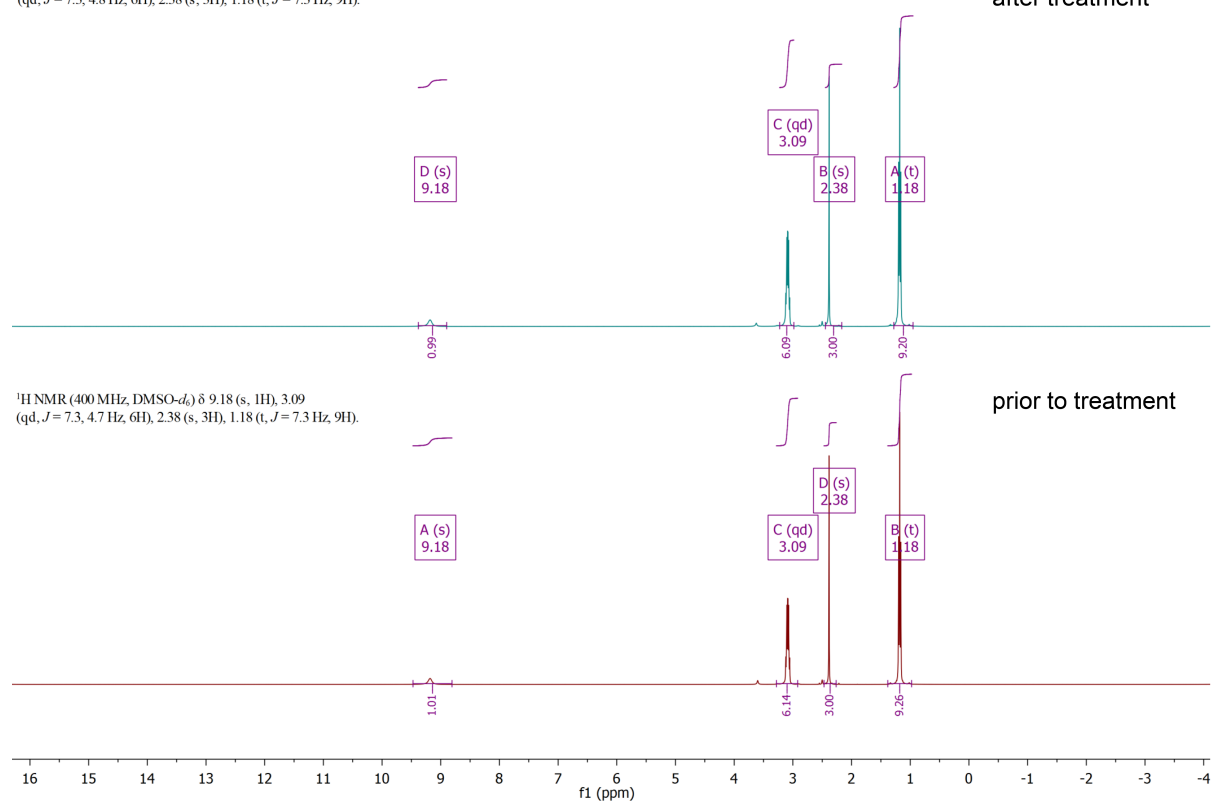

**Figure S3.** NMR spectra of triethylammonium methanesulfonate (TMS) after (top) and prior to electrochemical treatment (bottom).

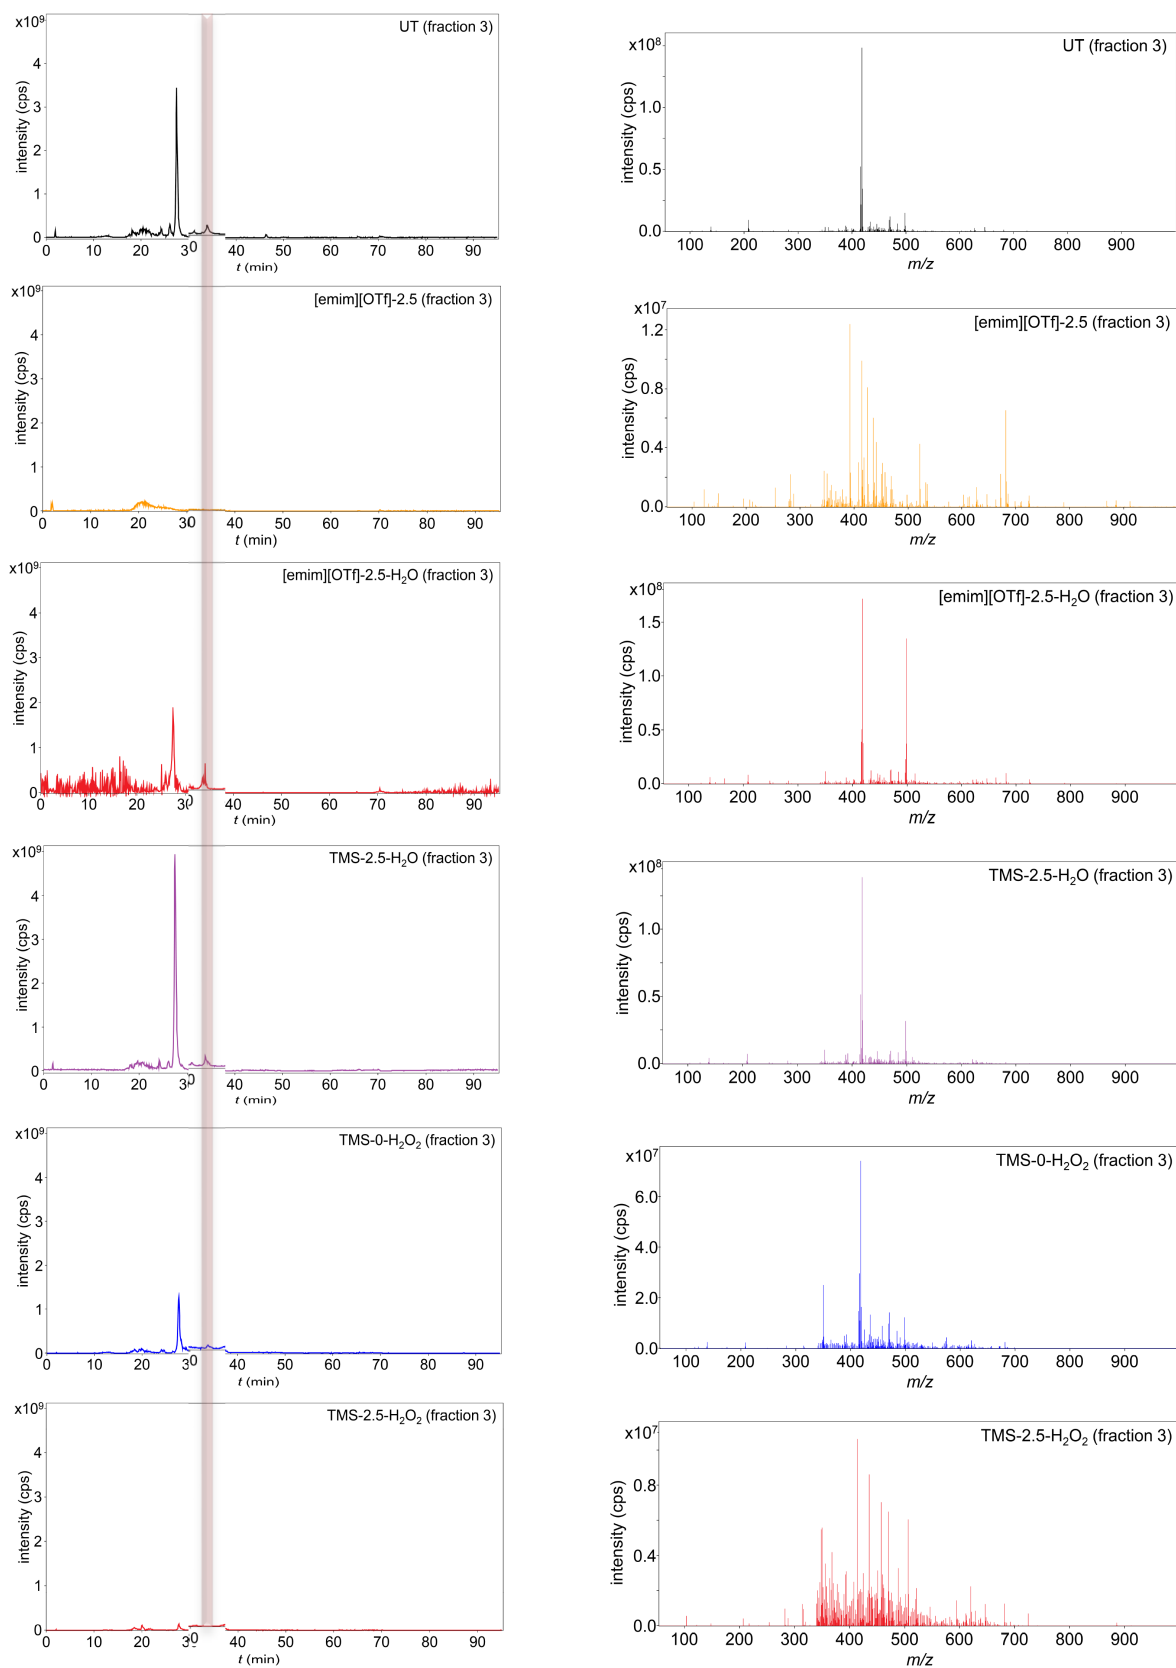

**Figure S4.** Base peak chromatograms (left) and averaged mass spectra (retention time, 34 min) (right) for each performed degradation process. Alkali lignin was used for all experiments.

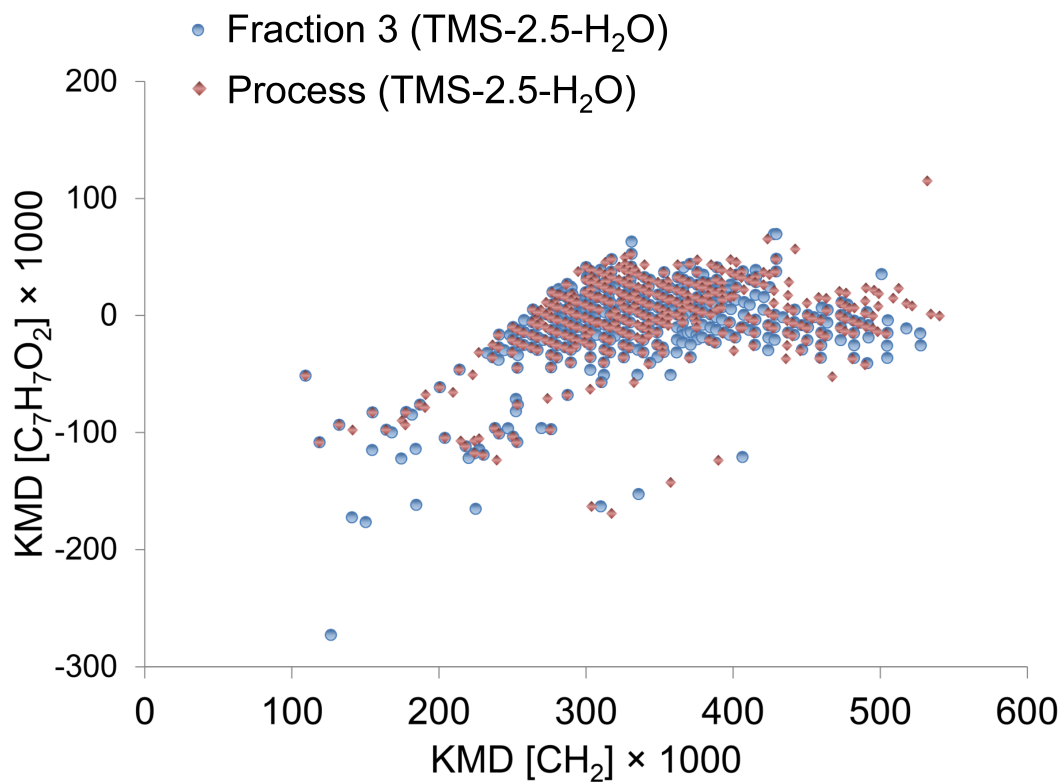

**Figure S5.** Overlay of Kendrick mass defect data of the purified fraction 3 from TMS-2.5-H<sub>2</sub>O and the corresponding raw mixture after electrochemical treatment using 2D mass defect filtering.

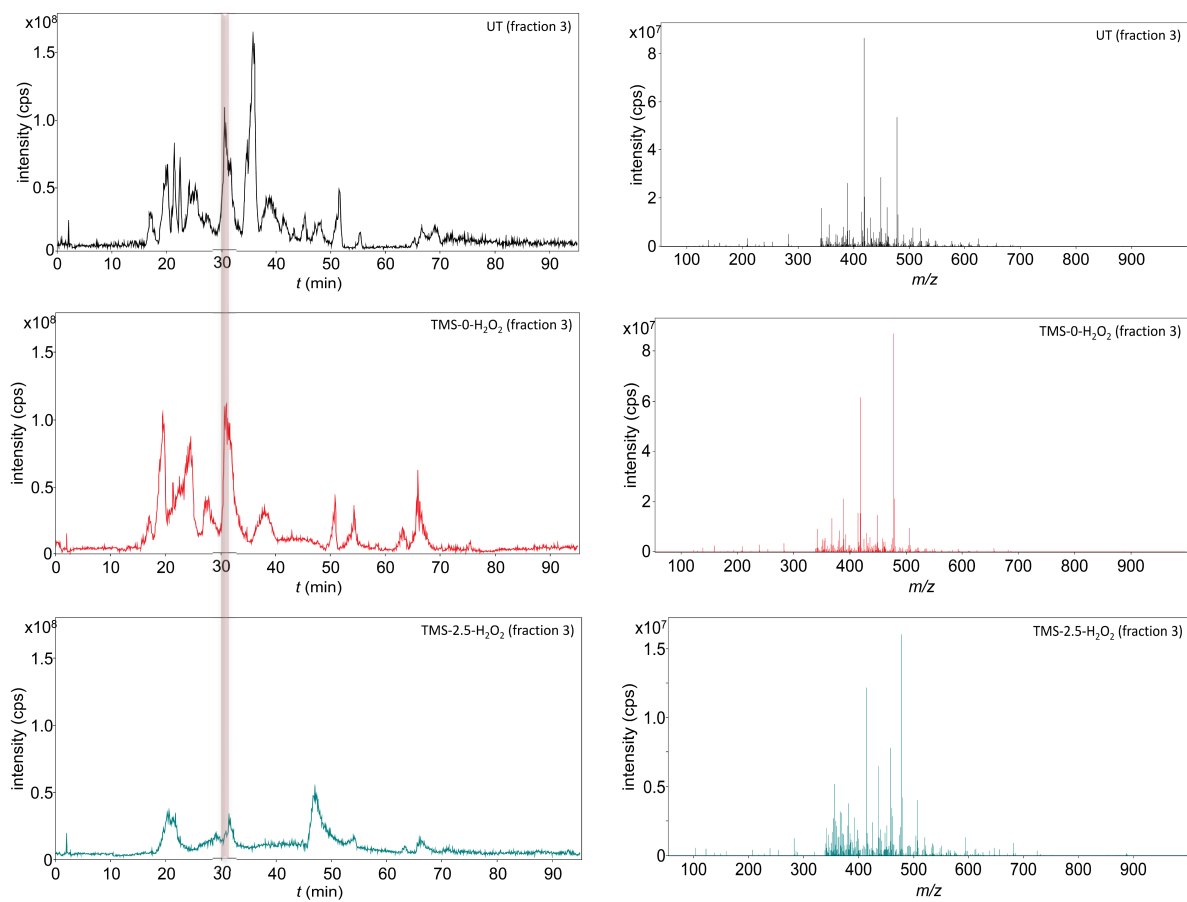

**Figure S6.** Base peak chromatograms (left) and averaged mass spectra (retention time, 30.5 min) (right) for each degradation process. Organosolv lignin was used for all experiments.

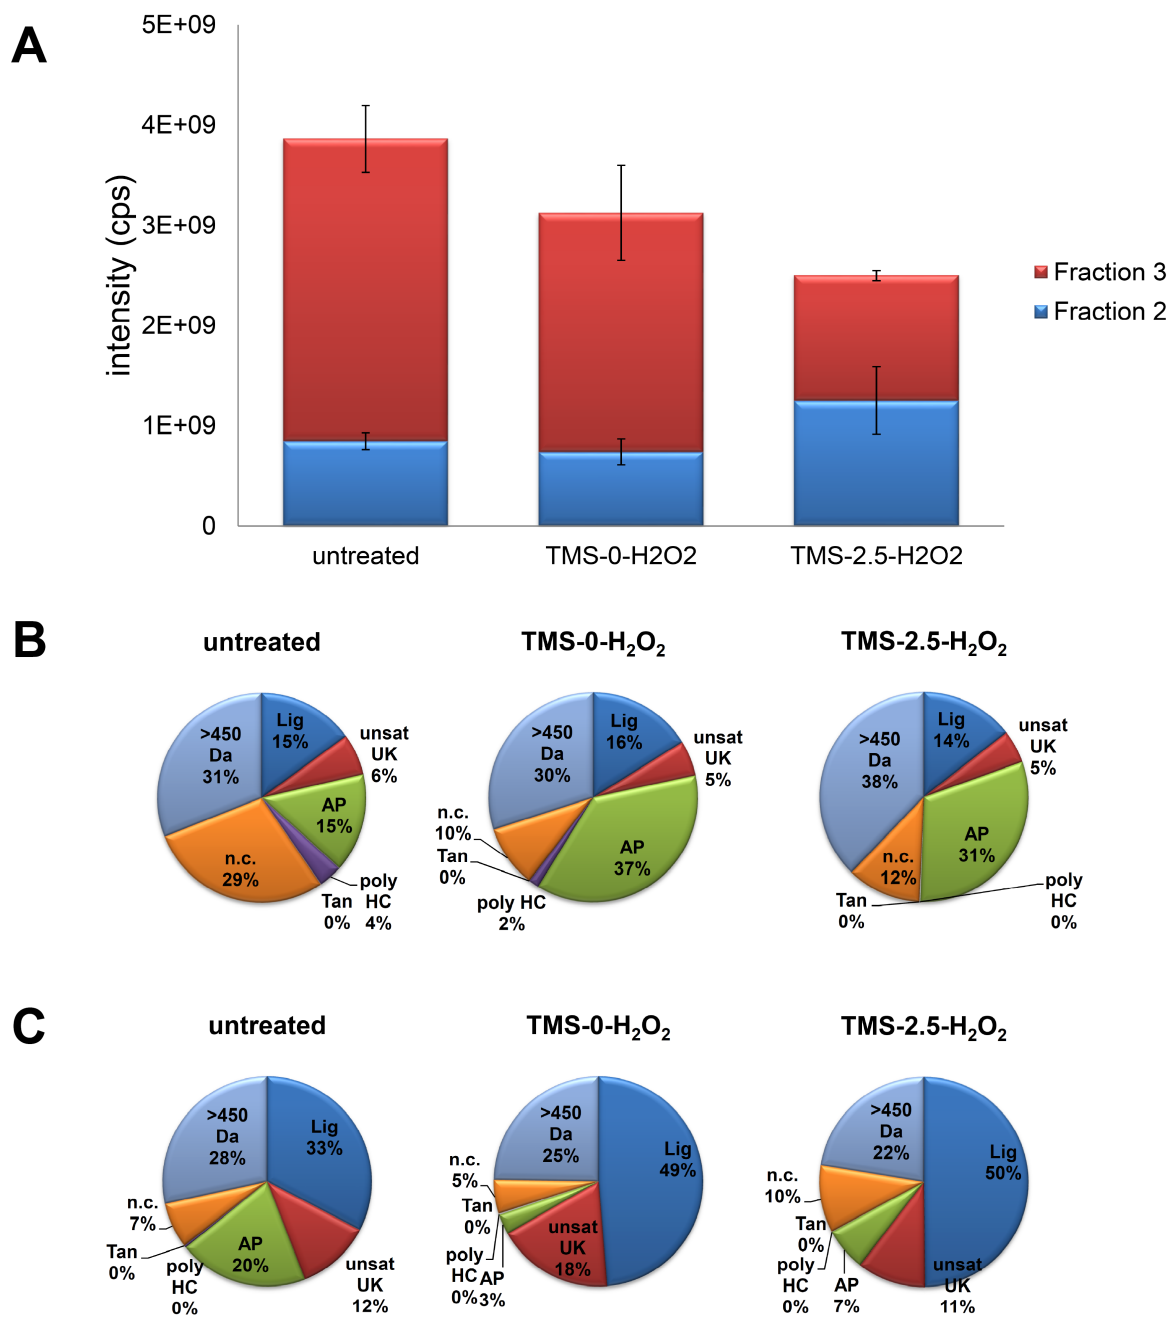

**Figure S7. A** Total intensity for relevant lignin degradation products (mass concentration,  $\beta=100 \mu\text{g}/\text{mL}$ ). **B** Relative distributions (%) of chemical classes for fraction 2. **C** Relative distributions (%) of chemical classes for fraction 3. Distributions were restricted to  $m/z \leq 450$ , unless otherwise specified. Organosolv lignin was used for all experiments.
